# Supplementary material for: LamaH-Ice: LArge-SaMple Data for Hydrology and Environmental Sciences for Iceland
Source: Copernicus journal article supplement (doi:10.5194/essd-2023-349), 2023-10-09
Supplement: Supplementary file 1 [file essd-2023-349-supplement.pdf]

# *Supplement of* **LamaH-Ice: LARge-SaMple Data for Hydrology and Environmental Sciences for Iceland**

Hordur B. Helgason<sup>1,2</sup>, Bart Nijssen<sup>1</sup>

5 <sup>1</sup>Department of Civil and Environmental Engineering, University of Washington, Seattle, 98195, USA

<sup>2</sup>Hydropower Division, Landsvirkjun, Reykjavík, 105 Iceland

*Correspondence to:* Hordur B. Helgason (helgason@uw.edu)

## **S1 Catchment delineation**

We delineated topographical catchments of the gauges in LamaH-Ice using the Pysheds python package (Bartos et al., 2020),  
10 which calculates flow directions from a digital elevation model (DEM) using the D8 routing scheme. We used the digital  
elevation model IslandsDEM version 1.0 (National Land Survey of Iceland, 2020) as input to Pysheds, along with gauge  
coordinates. The IslandsDEM data is mostly based on ArcticDEM (Porter et al., 2018), derived using images from the  
WorldView 1-3 and GeoEye-1 satellites. The satellite images were acquired mostly from 2012 to present, with some images  
15 dating back to 2008. In addition, IslandsDEM also includes some lidar and drone data corrections. The IslandsDEM data has  
a 2x2 m spatial resolution. Validation efforts using lidar data suggested a positional accuracy of better than 2 meters  
horizontally and better than 0.5 meters vertically, which provides an indication of the data's overall quality and accuracy.

As is common with optical remote sensing products, the ArcticDEM source data may exhibit void areas or artifacts, which  
can arise from factors such as cloud cover, shadows, or unfrozen water bodies (PGC, 2023). Additionally, the ArcticDEM  
datasets comprise imagery collected over multiple years and all seasons, and therefore, the data does not necessarily  
20 represent snow-free or temporally stable conditions (PGC, 2023). Due to computational reasons, we used a down-sampled  
version of the IslandsDEM with a 20x20 m resolution to delineate watersheds in LamaH-Ice. Before calculating flow  
directions, we conditioned the DEM data by filling depressions and resolving flats.

Although precise quantitative estimates of uncertainty for the final delineated watersheds used in this study are not available,  
it is acknowledged that uncertainties stem from the DEM, the DEM conditioning methods used, and the flow direction  
25 scheme used in the delineation. We verified the delineated catchments by comparing them to gauge catchments available  
from the Icelandic Meteorological Office (IMO) and the National Power Company of Iceland (NPC) and/or hydrologic  
information from the Digital map database of Iceland (IS 50V, maintained by the National Land Survey of Iceland). In  
instances where discrepancies emerged, a thorough investigation ensued, involving a detailed analysis of aerial photographs  
and an examination of publicly available information regarding potential human alterations to the watersheds.

30

On glaciers, the topographical catchments needed adjustments since glacial drainage area cannot be fully described using only surface elevation maps. The drainage area of meltwater depends on subglacial topography and the water pressure at the glacier bed, with water flowing in the direction of the steepest descent of the hydraulic potential. The drainage areas of Icelandic glaciers have been calculated based on ice thickness and subglacial topography by glaciologists at the University of Iceland (Björnsson, 1988; Björnsson et al., 2000; Pálsson et al., 2015, 2020). We used the outlines of the glacial watersheds to override the outlines calculated by Pysheds. It should be noted that the subglacial water pressure is not constant in time, and subglacial watersheds can vary with time. The subglacial watersheds have not been calculated systematically for Icelandic glaciers as the glaciers have evolved with time, and thus glacial watersheds are represented as static in the LamaH-Ice dataset. The year of reference in most cases is 2008-2010. This introduces limitations to the accuracy of the static delineations.

## **S2 Runoff data**

### **S2.1 Quality control of runoff data**

Since it is generally not feasible to continuously measure streamflow, water level measurements are used to estimate the flow rate at any given time. The relationship between streamflow and water level is known as a rating curve. It is determined by manually measuring the river flow at various water levels. Errors in streamflow estimations can thus arise from uncertainties in the water level measurements as well uncertainties in establishing the rating curve (Tomkins, 2014). When a rating curve has been established, it is still necessary to regularly measure the streamflow manually to monitor whether changes in the river channel profile have altered the relationship between water level and streamflow. Streamflow measurements in Iceland follow an international standard (ISO 18320:2020) that states that if there is more than a 5% difference between the manual measurement and the corresponding outcome from the rating curve, the rating curve should be re-evaluated. The use of newer acoustic doppler current profilers has resulted in lower uncertainty in streamflow measurements compared to measurements conducted with mechanical Doppler current profilers. Consequently, uncertainty in older streamflow series is higher.

Streamflow data in LamaH-Ice does not include quantifiable uncertainty estimates, as these estimates are not systematically calculated by providers of the streamflow data. However, a total of 5 quality codes for the water level measurements, which are based on subjective judgement, are included. These codes are used in the quality control process for streamflow measurements in Iceland. These codes are listed and described in Table S1. The first code (40) is assigned to data that is of highest quality, and the second code (80) is data with only minor interruptions, e.g., due to snow or ice. The third class (100) is data that is estimated due to instrumentation failure or missing data. The estimations are performed manually by hydrologists at the IMO and NPC, using nearby weather observations or nearby streamflow gauges. The fourth and fifth quality codes indicate lower quality or unchecked data, respectively.

A pre-filtered version of the streamflow timeseries is provided. This version only includes data of the two highest quality codes (40 and 80), along with a selection of data with the third-best quality code (100). In this version, data with the third quality code (100) is kept if the number of consecutive days is 10 or less. It is thus assumed that the manual gap filling is adequate for shorter durations (max 10 days). For longer spells without trusted observations, gap filling of streamflow measurements is more difficult, and the data is omitted.

## **S2.2 Runoff gauge identification**

In LamaH-Ice, the gauges are sorted alphabetically by the river name, and gauges are numbered accordingly, starting from 1 (“ID“ in Table A1). Most gauges in Iceland have a so-called “VHM” number, indicating the site being measured, as well as a “V” number, indicating the exact location/version of the gauge. The “V” and “VHM” numbers are provided in the attributes table (Table A1). As in LamaH-CE, the attributes table contains a field for official identification numbers of the gauges (“off\_no“ in Table A1). The official identification number field in LamaH-Ice uses the VHM number, and for gauges that do not have such a number, the NPC WISKI database ID number of these gauges is provided.

## **S2.3 River diversions**

Some rivers in Iceland are affected by diversions or hydropower dams that impact the runoff in downstream gauges. Once a diversion is built, the catchment area of downstream streamflow gauges is altered. In LamaH-Ice, streamflow observations timeseries are only included for fixed catchment areas. In the case of a diversion that changes the catchment area for a given gauge, observations are either cut short, or another series is created with an updated watershed area and an extension is given to the gauge name. Table S2 lists all gauges affected by diversions and shows which time periods are included in each series from these gauges. After a diversion is installed, the gauge (which now measures water outflow from an altered watershed) is assigned a new ID number (the original ID number multiplied by 10). Four “extra” gauges are therefore added to the 107 gauges in LamaH-Ice, resulting in 111 gauges with streamflow data from fixed watersheds.

## **S3 Catchment attributes**

### **S3.1 Topographic indices**

For calculations of topographic indices (other than area, which we derived using Pysheds as discussed in S1), we clipped the IslandsDEM by the catchment polygons and processed the clipped DEM with GDAL and Rasterio (python package). For slope calculation, we used the algorithm by Horn (1981). For calculating stream density, we used the EU-Hydro River Network Database (EU-Hydro - River Network Database, 2019) to represent the stream network, for consistency with the LamaH-CE dataset.

The length elongation of a catchment (Schumm, 1956) indicates the roundness of a catchment, which is an important areal property of a catchment. It is denoted as the ratio between the diameter of a circle that holds the same area as the catchment

and the catchment length. The higher the elongation ratio, the more round the catchment's shape is. We also calculated the length of the longitudinal axis of a catchment. By also including the angle formed by the northward direction and the longitudinal axis of the catchment, it becomes possible to infer the direction of precipitation (with respect to the catchment's longitudinal axis) and how precipitation systems move over catchments. We also calculated the stream density, i.e., length of all channels within a catchment divided by its area. Uncertainties in the DEM or watershed delineation method (described in section S1) can introduce potential inaccuracies in the calculations of these topographic indices.

### **S3.2 Climate and streamflow indices**

100 We calculated climate indices using the code from the original CAMELS dataset (Addor et al., 2017). If the climate indices are required for different periods, the R code provided in both the supplemental files and the GitHub repository can be re-run using the raw hydro-meteorological timeseries. To calculate streamflow indices, we used a Python implementation of the R code from the original CAMELS dataset (Molin, 2021).

### **S3.3 Land cover characteristics**

105 We calculated land cover characteristics based on the pan-European Coordination of Information on the Environment (CORINE) Land Cover dataset (Árnason and Matthíasson, 2020). CORINE is an inventory of land cover within Europe split into 44 categories, under 5 main classes: Artificial surfaces, agricultural areas, forested and semi natural areas (which includes glaciers), wetlands and water bodies. In total, 32 of the 44 land cover categories are found in Iceland. The inventory is produced by national agencies under supervision and quality control from the European Environment Agency. It has an update cycle of 6 years, with the most recent update in 2018.

110 We recognize that the CORINE dataset is subject to inherent uncertainties and limitations due to factors such as inaccuracies in the source data, limitations in remote sensing technologies, and potential misclassifications. The target thematic accuracy of CORINE is 85%. A comprehensive validation study for the 2000 version of CORINE using an independent data source showed that the target accuracy was fulfilled (Buttner and Maucha, 2006) although Iceland was not a part of the investigated area. Distinguishing between classes of similar land cover type can pose a challenge, especially for vegetation classes, many of which exhibit spectral resemblances. The geometric accuracy in CORINE has been better than 100m since 2000 (Árnason and Matthíasson, 2020). The temporal resolution of the dynamic version of the land cover characteristics in LamaH-Ice, which interpolates between the 2000, 2006, 2012, and 2018 CORINE updates, may not fully represent short-term land cover dynamics or events.

### **120 S3.4 Vegetation indices**

In processing the vegetation catchment characteristics, we followed the manual from the LamaH-CE dataset (Klingler et al., 2021), supplied by Christoph Klingler. These instructions include instructions how to process the remote sensing data in Google Earth Engine as well as post-processing steps in QGIS. The instructions are available in folder F in the dataset.

Leaf area index (LAI) is described as the aggregate leaf area (on one leaf side) per unit area of ground (Watson, 1947). LAI-based indices in the LamaH datasets are calculated from the MODIS MCD15A3H LAI product (version 6.1), with a 4-day temporal resolution and 500m spatial resolution (Myneni et al., 2015). The monthly mean LAI values are calculated based on a period of 19 years between 2002-08-01 to 2021-07-31.

The NDVI (Kriegler et al., 1969) was one of the earliest multispectral remote sensing post-processing products to be introduced and is currently the most popular index for assessing vegetation at the earth's surface (Huang et al., 2021). It is used for a variety of purposes, including vegetation monitoring, landcover type classification and environmental modeling (Li et al., 2021). The index formulation is based on how green vegetation distinctly reflects near-infrared wavelengths of incoming solar radiation, whilst absorbing a large part of light at the red end of the visible spectrum (Myneni et al., 2019). NDVI takes a value in the range of -1 to 1, with larger positive values indicating increasing vegetation and values approaching zero and below zero suggesting other surface types, such as water bodies, snow, ice, clouds, rock and soil (Saravanan et al., 2019). We calculated maximum and minimum monthly NDVI values for each catchment based on the MODIS MOD09Q1 dataset version 6.1 (Vermote, 2015). The spatial resolution of the dataset is 250m and temporal resolution is 8 days. We used a period of 22 years, from 2000-04-01 to 2022-03-31. We include the full range of NDVI values as obtained from the MODIS observations and leave the user to decide the minimum acceptable NDVI value to be used. A suggestion is 0.1 or 0.2, as values lower than that are usually considered non-vegetated areas (Gandhi et al., 2015). The GVF index is the fraction of green vegetation on soils and is widely used to provide information on vegetation in atmospheric and hydrologic models (Jiang et al., 2010; Broxton et al., 2014). The GVF index can be calculated from the MODIS NDVI values, using Eq. (1):

$$GVF = \frac{NDVI_{max/min} - NDVI_s}{NDVI_{c,v} - NDVI_s}, \quad (1)$$

Where  $NDVI_s$  is the yearly peak NDVI value of bare soil (set as 0.09) and  $NDVI_{c,v}$  is the annual peak NDVI of the green surface (Broxton et al., 2014). The annual peak value is derived from the IGBP land category (depicted in table 1 in Broxton et al. (2014)), and the IGBP land categories were acquired from the MODIS MCD12Q1 dataset (Friedl and Sulla-Menashe, 2019). We calculated the maximum monthly mean GVF index for each catchment, as well as the difference between the maximum and minimum values.

The vegetation indices in LamaH-Ice are derived from monthly mean or monthly maximum/minimum values of remote sensing data. While this approach provides valuable insights into the overall vegetation characteristics, it may either not capture or over-emphasize short-term, rapid fluctuations or specific events. The accuracy and reliability of the vegetation indices are contingent on the quality of the source data, i.e. the MODIS products. Limitations in remote sensing technology, cloud cover, and atmospheric conditions may introduce some degree of uncertainty.

### **S3.5 Surface deposits and soil characteristics**

155 Soils in Iceland are mostly Andisols, which is a soil type found in active volcanic areas, characterized by having large proportions of volcanic glass (Arnalds and Óskarsson, 2009). Andisols generally have a high soil fertility (Castillo et al., 2022), water holding capacity, total porosity and hydraulic conductivity (Fontes et al., 2004). Globally, Andisols are the least extensive soil type out of the 12 soil orders defined by the US Department of Agriculture (USDA), occupying approximately 0.7% of the earth's ice-free surface (USDA, 1999).

160 We derived the depth to bedrock attribute from the Global 1-km Gridded Thickness of Soil, Regolith, and Sedimentary Deposit Layers (GGT; Pelletier et al., 2016). We used the European Soil Database Derived data (ESDD; Hiederer, 2013a, b) to calculate the other 8 attributes. The ESDD has a spatial resolution of 1 km and is based on the European Soil Database (Panagos, 2006), the Harmonized World Soil Database (Nachtergaele et al., 2008) and the Soil-Terrain Database (van Engelen and Dijkshoorn, 2013). The ESDD provides the soil depth available for roots and then provides 8 soil properties for  
165 two soil layers, a topsoil layer (0-30 cm depth) and a subsoil layer (30-150 cm depth). To calculate soil attributes based on the ESDD, we combined the two soil layers by weighting the values from each layer based their depth, with the available root depth as the maximum depth. For the attribute describing total available water content, we summed the values from the two layers.

The data sources described here have very course spatial resolution compared to many of the other input data used to  
170 calculate catchment characteristics in LamaH-Ice. Uncertainties in these data sources are considerable and the catchment characteristics should be interpreted very carefully. The GGT data set was calibrated and validated using independent soil thickness measurements in the U.S. and Europe, and observations from groundwater wells in the U.S. The calibration and validation mainly used data from midlatitude regions. It is thus acknowledged that the data has limited accuracy in high-latitude regions. Further, the treatment of valley bottoms in the data set (assumed to be V-shaped, rather than U-shaped) does  
175 not work well for glacial valleys (Pelletier et al., 2016a) such as commonly found in Iceland. The ESD data set has a maximum soil depth of 1.5 and relies heavily on extrapolated soil profile observations and expert estimations. The accuracy of the data can thus be especially low in situations involving deep soils, heterogeneous soil conditions or substantial distances between soil profiles.

180 In LamaH-CE, saturated hydraulic conductivity was calculated from the 3D Soil Hydraulic Database of Europe (3DSHD; Tóth et al., 2017). This database does not contain realistic values for Iceland and we did thus not include this parameter in LamaH-Ice.

### **S3.6 Geological characteristics**

The GLiM dataset describes the rock types of the earth's surface. The global map containing a total of 1,235,400 polygons  
185 was made from joining 92 existing regional geological maps. The average scale of GLiM is 1:3,750,000. The regional map

used in GLiM for Northern Europe (including Iceland) was a geological map from the Geological Survey of Norway (Sigmond, 2002) at the scale 1:4,000,000.

190 GLiM contains lithological classifications on three levels. The first level describes the most dominant lithological class, and is the only level included in LamaH-CE. The classification is comparable to previously defined global lithological maps. The first level contains 16 classes, of which only four are contained in Iceland; “basic volcanic rocks” (which covers most of the land area), “acid volcanic rocks”, “basic plutonic rocks” and “acid plutonic rocks”. The dominant geological class for all catchments in LamaH-Ice is “basic volcanic rocks”.

195 GLiM contains two additional layers that describe more specific rock attributes. Since the first level does not adequately describe the lithology of Iceland, we include information from the additional two layers. While the GLiM map has a classification for both water bodies and ice and glaciers, it was only assigned if the regional map represented water or ice areas. In Iceland’s case, the regional map used in GLiM (Sigmond, 2002) did not represent water or glaciers. To supplement the GLiM map, we included catchment characteristics derived from a geological map of Iceland in a much finer resolution (Icelandic Institute of Natural History, 2014).

#### S4 Dataset structure

200 For meteorological timeseries and catchment attributes, three folders are supplied, one for each delineation method (A, B and C). Each folder contains three subfolders: “attributes”, “timeseries” and “shapefiles”. The “attributes” folder contains one .csv file with static catchment attributes. The “timeseries” folder contains meteorological timeseries and snow cover/glacier albedo timeseries as well as annual timeseries of glacier mass balance and extent and CORINE land cover change. The “shapefiles” folder contains the catchment as shapefiles and GeoPackages. A separate folder contains information about the gauges, including streamflow observations (“D\_gauges”). The folder structure is shown in Table S3.

**Table S1: Quality codes assigned to water level observations.**

| <b>Quality code</b> | <b>Class</b>              | <b>Description/Criteria</b>                                                                                 |
|---------------------|---------------------------|-------------------------------------------------------------------------------------------------------------|
| 40                  | Good (of highest quality) | Data is good. Water level is recorded without any interruptions.                                            |
| 80                  | Fair (second class)       | Water level data has minor interruptions, e.g. due to ice.                                                  |
| 100                 | Estimated                 | Data is estimated due to instrumentation failure, ice interruptions or missing data. Estimations use nearby |

|     |           |                                                                                                                                                                                                                                                       |
|-----|-----------|-------------------------------------------------------------------------------------------------------------------------------------------------------------------------------------------------------------------------------------------------------|
|     |           | weather observations and/or nearby streamflow gauges.                                                                                                                                                                                                 |
| 120 | Suspect   | Suspected data. Low quality. Two example reasons: A) The water level recording shows spikes but the main line is correct. B) The sensor experiences fluctuations, and there are no manual measurements available to confirm the accuracy of the data. |
| 200 | Unchecked | Unchecked data.                                                                                                                                                                                                                                       |

210

**Table S2: Rivers affected by diversions**

| River                                      | Gauge ID          | Period                                                                           | Area [km <sup>2</sup> ] | Description                                                                                                                                                                                                                                                                                                                                                                                                                                                                                                                                                                                                                                             |
|--------------------------------------------|-------------------|----------------------------------------------------------------------------------|-------------------------|---------------------------------------------------------------------------------------------------------------------------------------------------------------------------------------------------------------------------------------------------------------------------------------------------------------------------------------------------------------------------------------------------------------------------------------------------------------------------------------------------------------------------------------------------------------------------------------------------------------------------------------------------------|
| <b>Tungufljót,<br/>Faxi, V68</b>           | 89<br>890         | 1951-09-01 to 1986-09-30<br>1986-10-01 to 2019-09-30                             | 829<br>201              | Before 1986, the Tungufljót river ran from the lake Sandvatn. To prevent wind erosion from mud-flats on the banks of the glacier-fed Sandvatn, the water level in the lake was raised in 1986, and the lake outflow was diverted to Sandá. Since 1986, the lake outflow has occasionally run back to Tungufljót, for example in large flood events. After a flood in 2006, the flow to Tungufljót increased (Jónsson, Þórarinsdóttir et al Met office 2010). The type of impact for gauge IDs 89 and 890 is set as “E” and the degree of impact is set as “s”, because of uncertainty of how much water flows from Sandvatn to Tungufljót and to Sandá. |
| <b>Þjórsá,<br/>Norðlingaalda,<br/>V100</b> | 99<br>990<br>9900 | 1970-01-01 to 1980-09-30<br>1985-10-01 to 1996-09-30<br>1997-10-01 to 2021-09-30 | 2044<br>1620<br>839     | The Kvíslaveita Diversion (for hydropower) was built in 5 stages between 1980 and 1997. Water from the                                                                                                                                                                                                                                                                                                                                                                                                                                                                                                                                                  |



upper reaches of Þjórsá was diverted into Lake Þórisvatn. During the first period of measurements (gauge ID 99), the river's watershed is natural. No measurements are provided while the first 4 stages of the diversion were being built (1980 to 1985). The watershed did not change during 1985-1996. The 5<sup>th</sup> stage of the Kvíslaveita diversion was built in 1996-1997. After 1997, this water is occasionally allowed to flow back into Þjórsá. For this reason, after 1997 (for gauge ID 9900), the type of impact is set as "E" and the degree of impact is set as "s".

|                     |      |                          |      |                                          |
|---------------------|------|--------------------------|------|------------------------------------------|
| <b>Þjórsá,</b>      | 101  | 1988-10-10 to 1996-09-30 | 2238 | See above. This gauge is located roughly |
| <b>Dynkur, V112</b> | 1010 | 1997-10-01 to 2021-09-30 | 1457 | 20 km below the V100 gauge.              |

**Table S3: Dataset structure**

| Base folder                  | Subfolder    | Subfolder | Data                                                                                               |
|------------------------------|--------------|-----------|----------------------------------------------------------------------------------------------------|
| A_basins_<br>total_upstrm    | 1_attributes |           | Catchment<br>attributes and water balance<br>table                                                 |
|                              |              | Annual    | Corine land cover and<br>glacier extent and mass<br>balance time series                            |
| B_basins_intermediate_all    | 2_timeseries | Daily     | Meteorological time series<br>and modis fractional snow<br>cover and glacier albedo<br>time series |
|                              |              | Hourly    | Meteorological time series                                                                         |
| C_basins_intermediate_lowimp | 3_shapefiles |           | Basins and glacier shapefiles                                                                      |

|                  |                                        |       |                                                                                                                      |
|------------------|----------------------------------------|-------|----------------------------------------------------------------------------------------------------------------------|
|                  |                                        |       | and GeoPackages                                                                                                      |
| D_gauges         | 1_attributes                           |       | Gauge attributes and hydrological indices                                                                            |
|                  | 2_timeseries                           | Daily | Streamflow measurements                                                                                              |
|                  | 3_shapefiles                           |       | Gauge shape file and GeoPackage file                                                                                 |
| E_stream_network |                                        |       | A shape file (and GeoPackage) of the EU-Hydro network and information file                                           |
| F_appendix       | 1_codes                                |       | Code used to create the LamaH-Ice dataset (also available on Github)                                                 |
|                  | 2_shapefiles                           |       | The ERA5-Land grid on shape file and geopackage format                                                               |
|                  | 3_CORINE_landcover                     |       | Source information about the CORINE land cover data                                                                  |
|                  | 4_QGIS_and_GEE_processing_instructions |       | Instructions to re-create vegetation and soil indices in Google Earth Engine and QGIS                                |
| G_Information    |                                        |       | Information about the folder structure of the dataset, the references of the source data and the license of the data |

215

## References

- Addor, N., Newman, A. J., Mizukami, N., and Clark, M. P.: The CAMELS data set: Catchment attributes and meteorology for large-sample studies, *Hydrol Earth Syst Sci*, 21, 5293–5313, <https://doi.org/10.5194/hess-21-5293-2017>, 2017.
- Arnalds, Ó. and Óskarsson, H.: Íslenskt Jarðvegskort / A soil map for Iceland, *Náttúrufræðingurinn*, 78, 107–121, 2009.

- 220 Árnason, K. and Matthíasson, I.: CORINE land cover classification 2018 - Land cover changes in Iceland 2012-2018. (Title in Icelandic: CORINE-landflokkun 2018 - Landgerðarbreytingar á Íslandi 2012-2018). Technical report, National Land Survey of Iceland, available at [https://www.lmi.is/static/files/corine/corine\\_2018\\_lokaskyrsla.pdf](https://www.lmi.is/static/files/corine/corine_2018_lokaskyrsla.pdf), 2020.
- Bartos, M., Debbout, R., and Huard, D.: Pysheds, Zenodo [code], <https://doi.org/10.5281/ZENODO.3822495>, 12 May 2020.
- Björnsson, H.: Hydrology of Ice Caps in Volcanic Regions, in: Hydrology of Ice Caps in Volcanic Regions, Reykjavik
- 225 Societas Scientiarum Islandica, University of Iceland, Reykjavik, 1988.
- Björnsson, H., Pálsson, F., and Guðmundsson, M. T.: Surface and bedrock topography of the Mýrdalsjökull ice cap, Iceland: The Katla caldera, eruption sites and routes of jökulhlaups, *Jökull*, 49, 29–46, <https://doi.org/10.33799/JOKULL2000.49.029>, 2000.
- Broxton, P. D., Zeng, X., Scheftic, W., and Troch, P. A.: A MODIS-Based Global 1-km Maximum Green Vegetation
- 230 Fraction Dataset, *J Appl Meteorol Climatol*, 53, 1996–2004, <https://doi.org/10.1175/JAMC-D-13-0356.1>, 2014.
- Buttner, G. and Maucha, G.: The thematic accuracy of Corine land cover 2000 Assessment using LUCAS (land use/cover area frame statistical survey). Technical report no. 7/2006, Copenhagen, 2006.
- Castillo, X., Materna, J., Jannoura, R., and Joergensen, R. G.: Peanut monoculture-induced decline in fertility of Andosols in Nicaragua, *Journal of Plant Nutrition and Soil Science*, 185, 677–684, <https://doi.org/10.1002/JPLN.202200112>, 2022.
- 235 van Engelen, V. W. P. and Dijkshoorn, J. A.: Global and National Soils and Terrain Digital Databases (SOTER) Procedures Manual Version 2.0, Wageningen, Netherlands, 2013.
- EU-Hydro - River Network Database, V. 1. 2: European Environment Agency under the framework of the Copernicus program [data set], available at <https://land.copernicus.eu/imagery-in-situ/eu-hydro/eu-hydro-river-network-database>, last access: 30 June 2022, 2019.
- 240 Fontes, J. C., Gonçalves, M. C., and Pereira, L. S.: Andosols of Terceira, Azores: Measurement and significance of soil hydraulic properties, *Catena (Amst)*, 56, 145–154, <https://doi.org/10.1016/J.CATENA.2003.10.008>, 2004.
- Friedl, M. and Sulla-Menashe, D.: MCD12Q1 MODIS/Terra+Aqua Land Cover Type Yearly L3 Global 500m SIN Grid V006 [data set], <https://doi.org/10.5067/MODIS/MCD12Q1.006>, 2019.
- Gandhi, G. M., Parthiban, S., Thummalu, N., and Christy, A.: Ndvi: Vegetation Change Detection Using Remote Sensing
- 245 and Gis – A Case Study of Vellore District, *Procedia Comput Sci*, 57, 1199–1210, <https://doi.org/10.1016/J.PROCS.2015.07.415>, 2015.
- Hiederer, R.: Mapping Soil Properties for Europe - Spatial Representation of Soil Database Attributes, Luxembourg, 2013a.
- Hiederer, R.: Mapping Soil Typologies - Spatial Decision Support Applied to the European Soil Database, Luxembourg, 2013b.
- 250 Horn, B. K. P.: Hill Shading and the Reflectance Map, *Proceedings of the IEEE*, 69, 14–47, <https://doi.org/10.1109/PROC.1981.11918>, 1981.

- Huang, S., Tang, L., Hupy, J. P., Wang, Y., and Shao, G.: A commentary review on the use of normalized difference vegetation index (NDVI) in the era of popular remote sensing, *J For Res (Harbin)*, 32, 1–6, <https://doi.org/https://doi.org/10.1007/s11676-020-01155-1>, 2021.
- 255 Icelandic Institute of Natural History: Geological map of Iceland [data set], available at <https://gatt.lmi.is/geonetwork/srv/eng/catalog.search#/metadata/%7B005FFDAD-69A1-4385-B16F-FD31B960FE33%7D>, last access: 30 June 2022, 2014.
- ISO 18320:2020: Hydrometry - Measurement of liquid flow in open channels - Determination of the stage-discharge relationship, International Organization for Standardization, 2020.
- 260 Jiang, L., Kogan, F. N., Guo, W., Dan Tarpley, J., Mitchell, K. E., Ek, M. B., Tian, Y., Zheng, W., Zou, C.-Z., Ramsay, B. H., Jiang, C. :, Kogan, F. N., Guo, W., Tarpley, J. D., Mitchell, K. E., Ek, M. B., Tian, Y., Zheng, W., Zou, C.-Z., and Ramsay, B. H.: Real-time weekly global green vegetation fraction derived from advanced very high resolution radiometer-based NOAA operational global vegetation index (GVI) system, *Journal of Geophysical Research: Atmospheres*, 115, 11114, <https://doi.org/10.1029/2009JD013204>, 2010.
- 265 Klingler, C., Schulz, K., and Herrnegger, M.: LamaH-CE: LARge-SaMple DAta for Hydrology and Environmental Sciences for Central Europe, *Earth Syst Sci Data*, 13, 4529–4565, <https://doi.org/10.5194/ESSD-13-4529-2021>, 2021.
- Kriegler, F., Malila, W., Nalepka, R., and Richardson, W.: Preprocessing transformations and their effect on multispectral recognition, *Remote Sens Environ*, VI, 97–132, 1969.
- Li, S., Xu, L., Jing, Y., Yin, H., Li, X., and Guan, X.: High-quality vegetation index product generation: A review of NDVI  
270 time series reconstruction techniques, *International Journal of Applied Earth Observation and Geoinformation*, 105, 102640, <https://doi.org/10.1016/J.JAG.2021.102640>, 2021.
- Molin, M. D.: HydroAnalysis, [code], available at, <https://github.com/dalmo1991/HydroAnalysis>, last access: 17 February 2023, 2021.
- Myneni, R., Knyazikhin, Y., and Park, T.: MCD15A3H MODIS/Terra+Aqua Leaf Area Index/FPAR 4-day L4 Global 500m  
275 SIN Grid V006 [data set], NASA EOSDIS Land Processes DAAC, <https://doi.org/10.5067/MODIS/MCD15A3H.006>, 2015.
- Myneni, R. B., Hall, F. G., Sellers, P. J., and Marshak, A. L.: The interpretation of spectral vegetation indexes, *IEEE Transactions on Geoscience and Remote Sensing*, 33, 481–486, <https://doi.org/10.1109/TGRS.1995.8746029>, 2019.
- Nachtergaele, F. O. +, van Velthuisen, H., Verelst, L., Batjes, N. H., Dijkshoorn, J. A., van Engelen, V. W. P., Fischer, G., Jones, A., Montanarella, L., Petri, M., Prieler, S., Teixeira, E., Wilberg, D., and Shi, X.: Harmonized World Soil Database  
280 (version 1.0)., Food and Agric Organization of the UN (FAO); International Inst. for Applied Systems Analysis (IIASA); ISRIC - World Soil Information; Inst of Soil Science-Chinese Acad of Sciences (ISS-CAS); EC-Joint Research Centre (JRC), 2008.
- National Land Survey of Iceland: IslandsDEM version 1.0 [data set], available at, <https://gatt.lmi.is/geonetwork/srv/eng/catalog.search#/metadata/e6712430-a63c-4ae5-9158-c89d16da6361>, 2020.

- 285 Pálsson, F. and Gunnarsson, A.: Afkomu- og hraðamælingar á Langjökli jökulárið 2012–2013, Tech. Rep. LV-2015-076, Landsvirkjun, Reykjavík, Iceland, 2015.
- Pálsson, F., Gunnarsson, A., Jónsson, G., Pálsson, H. S., and Steinþórsson, S.: Vatnajökull: Mass balance, meltwater drainage and surface velocity of the glacial year 2018–19, Landsvirkjun, Reykjavík, RH-01-20 – LV-2020-016, 56, 2020.
- Panagos, P.: The European Soil Database, GEO: connexion, 5, 32–33, 2006.
- 290 Pelletier, J. D., Broxton, P. D., Hazenberg, P., Zeng, X., Troch, P. A., Niu, G. Y., Williams, Z., Brunke, M. A., and Gochis, D.: A gridded global data set of soil, intact regolith, and sedimentary deposit thicknesses for regional and global land surface modeling, *J Adv Model Earth Syst*, 8, 41–65, <https://doi.org/10.1002/2015MS000526>, 2016a.
- Pelletier, J. D., Broxton, P. D., Hazenberg, P., Zeng, X., Troch, P. A., Niu, G., Williams, Z. C., Brunke, M. A., and Gochis, D.: Global 1-km Gridded Thickness of Soil, Regolith, and Sedimentary Deposit Layers, ORNL DAAC, Oak Ridge, Tennessee, USA, <https://doi.org/https://doi.org/10.3334/ORN LDAAC/1304>, 2016b.
- 295 PGC: The Polar Geospatial Center: PGC DEM Products – ArcticDEM, REMA, and EarthDEM, last access: 27 September 2023, 2023.
- Porter, C., Morin, P., Howat, I., Noh, M.-J., Bates, B., Peterman, K., Keeseey, S., Schlenk, M., Gardiner, J., Tomko, K., Willis, M., Kelleher, C., Cloutier, M., Husby, E., Foga, S., Nakamura, H., Platson, M., Wethington Michael, Jr., Williamson, C., Bauer, G., Enos, J., Arnold, G., Kramer, W., Becker, P., Doshi, A., D’Souza, C., Cummens, P., Laurier, F., and Bojesen, M.: ArcticDEM, Version 3, <https://doi.org/10.7910/DVN/OHHUKH>, 2018.
- 300 Saravanan, S., Jegankumar, R., Selvaraj, A., Jacinth Jennifer, J., and Parthasarathy, K. S. S.: Utility of Landsat Data for Assessing Mangrove Degradation in Muthupet Lagoon, South India, *Coastal Zone Management: Global Perspectives, Regional Processes, Local Issues*, 471–484, <https://doi.org/10.1016/B978-0-12-814350-6.00020-3>, 2019.
- 305 Schumm, S. A.: Evolution of drainage systems and slopes in Badlands at Perth Amboy, New Jersey, *GSA Bulletin*, 67, 597–646, <https://doi.org/https://doi.org/10.1130/0016-7606>, 1956.
- Sigmond, E. M. O.: Geological map of land and sea areas of Northern Europe, 2002.
- Tomkins, K. M.: Uncertainty in streamflow rating curves: Methods, controls and consequences, *Hydrol Process*, 28, 464–481, <https://doi.org/10.1002/HYP.9567>, 2014.
- 310 Tóth, B., Weynants, M., Pásztor, L., and Hengl, T.: 3D soil hydraulic database of Europe at 250 m resolution, *Hydrol Process*, 31, 2662–2666, <https://doi.org/10.1002/HYP.11203>, 2017.
- USDA (US Department of Agriculture): Soil taxonomy: A basic system of soil classification for making and interpreting soil surveys, U.S. Department of Agriculture Handbook 436, 2nd ed., Natural Resources Conservation Service, 1999.
- Vermote, E.: MOD09Q1 MODIS/Terra Surface Reflectance 8-Day L3 Global 250m SIN Grid V006 [data set], NASA EOSDIS Land Processes DAAC, <https://doi.org/10.5067/MODIS/MOD09Q1.006>, 2015.
- 315 Watson, D. J.: Comparative physiological studies in the growth of field crops. I. Variation in net assimilation rate and leaf area between species and varieties, and within and between years., *Ann Bot*, 11, 41–76, 1947.
