# Supplementary material for: LamaH-Ice: LArge-SaMple Data for Hydrology and Environmental Sciences for Iceland
Source: Copernicus journal article supplement (doi:10.5194/essd-2023-349), 2023-10-09
Supplement: Supplementary file [file essd-2023-349-CC1-supplement.pdf]

## Comment on

### “LamaH-Ice: Large-Sample Data for Hydrology and Environmental Sciences for Iceland” by Helgason and Nijssen submitted to Earth Systems Science Data

#### 1. General

Dear authors, I was asked to act as a reviewer but declined because of a possible conflict of interest. I really appreciate your work and think that LamaH-Ice will become an important part for large-scale analysis, especially in the cold and glaciated region. The variety of static and dynamic attributes related to snow and ice cover are a novelty within LSH datasets and therefore of great value for the scientific community. You described the executed steps precisely in the article, the attached supplements are also a great support. The dataset is clearly structured and the attached text files give a nice orientation.

I didn't do a detailed review, but for a start, I noted a few points that I picked up while reading the preprint and browsing in the dataset:

#### 2. Comments preprint

L180: Can you plot the size of your circles depending on the catchment size in Figure 1?

L224: On my site the line is more green than blue.

L244: What is WRF?

L267: Can you add a plot (like Figure 3d) between ERA5-L and CARRA at least in the supplements?

L268: What is with the snow, that was blown away? The influence of wind can be huge – at least in the Alps.

L269: Beside thaw events, sublimation and wind are also important factors.

L303: Note that the Budyko curve represents a reference condition for the water balance and meets not the variability on the whole globe. Deviations from the curve are therefore not always measurement errors. I think that in your case too low P or PET values can't explain the deviation from the Budyko curve solely. Perhaps you can do a more detailed investigation here or explain the Budyko curve more clearly. Otherwise, most readers will think that the deviation is a big error.

L304: I think “higher ETA” is more sufficient than “high ETA”.

L305: Do you mean Figure 3c?

L307: What is with glacier melt? 68 of the 107 catchments are partly covered by glaciers.

L342: Do you have the positions, where the glacier measurements are done? A plot with the sites on the glacier and the intersecting 32 catchments would be nice (maybe for the supplements).

L371: Can you explain the high variability of PET especially in the south? Following Figure 5b) there are neighbouring basins with mean PET values of 0,5 and 3 mm/day within in a very short distance.

L461: I would refer to the supplement in all your subsections. The reference to S3.3 in the subsection 5.4 (land cover) is missing, for example.

L481: Sometimes there is Lamah instead of LamaH.

L596: Would it be possible to calculate an attribute indicating the deviation of the area from your basin delineation to those given by the data provider (IMO, NPC)? → see attribute “area\_ratio” in LamaH-CE

### 3. Comments dataset

- a. There are two files in D\_gauges/1\_attributes/ for the gauge attributes (Gauge\_attributes.csv and Gauge\_attributes\_.csv). In the readme file is no explanation for that.
- b. Can you add the attribute “area\_calc” in the file “Gauge\_attributes”?
- c. I would add the quality codes (including the code 250) in the readme file for the gauge attributes and add the code 250 (gap) in the supplement table S1.
- d. The separator in your csv files is sometimes comma (e.g. gauge attributes) and sometimes semicolon (e.g. runoff time series). I suggest using solely semicolon as a separator.
- e. Some special characters (e.g. æ) will certainly cause display problems for some users. This is just a hint.
- f. Can you add at least the most important attributes to your Basin shapefiles?
- g. Can you create metadata for your shapefiles that include at least a reference to your paper and a note that the units are described there in the tables? This will ensure the connection.
- h. I imported your shapefiles in a GIS and saw that they all have the coordinate system EPSG 3057. In contrast, the text file “Folder\_structure” and the readme files state that Basins\_C.shp and gauges.shp have EPSG 3035.

Best,  
Christoph Klingler  
University of Natural Resources and Life Sciences, Vienna  
Institute for Hydrology and Water Management  
[christoph.klingler@boku.ac.at](mailto:christoph.klingler@boku.ac.at)
